# Supplementary material for: Differentiating gastric cancer and gastric lymphoma using texture analysis (TA) of positron emission tomography (PET)
Source: PubMed Central journal article supplement — Chin Med J (Engl). 2020 Nov 18;134(4):439–47. doi: 10.1097/CM9.0000000000001206 (PMC7909296; doi:10.1097/cm9.0000000000001206), 2020-11-18
Supplement: cm9-134-439-s001.pdf [file cm9-134-439-s001.pdf]

**Supplemental table 1:** Intra-observer agreement of PET texture features.

| Parameters                  | Intra-class correlation coefficients |
|-----------------------------|--------------------------------------|
| Mean                        | 0.973                                |
| SD                          | 0.989                                |
| Max-frequency               | 0.791                                |
| Mode                        | 0.724                                |
| Minimum                     | 0.764                                |
| Maximum                     | 0.999                                |
| 5 <sup>th</sup> percentile  | 0.783                                |
| 10 <sup>th</sup> percentile | 0.800                                |
| 25 <sup>th</sup> percentile | 0.849                                |
| 50 <sup>th</sup> percentile | 0.952                                |
| 75 <sup>th</sup> percentile | 0.990                                |
| 90 <sup>th</sup> percentile | 0.997                                |
| Skewness                    | 0.759                                |
| Kurtosis                    | 0.827                                |
| Entropy                     | 0.941                                |
| Volume                      | 0.867                                |
| Area                        | 0.867                                |
| Max-diameter                | 0.891                                |
| Entropy <sub>GLCM10</sub>   | 0.766                                |
| Entropy <sub>GLCM11</sub>   | 0.769                                |
| Entropy <sub>GLCM12</sub>   | 0.765                                |
| Entropy <sub>GLCM13</sub>   | 0.764                                |
| Inertia <sub>GLCM10</sub>   | 0.956                                |
| Inertia <sub>GLCM11</sub>   | 0.965                                |
| Inertia <sub>GLCM12</sub>   | 0.970                                |
| Inertia <sub>GLCM13</sub>   | 0.955                                |

SD: Standard deviation;PET: Positron emission tomography;GLCM: Grey-level co-occurrence matrix.

**Supplemental table 2:** Interobserver agreement of PET texture features.

| Parameters                  | Intra-class correlation coefficients |
|-----------------------------|--------------------------------------|
| Mean                        | 0.968                                |
| SD                          | 0.988                                |
| Max-frequency               | 0.808                                |
| Mode                        | 0.777                                |
| Minimum                     | 0.725                                |
| Maximum                     | 0.998                                |
| 5 <sup>th</sup> percentile  | 0.748                                |
| 10 <sup>th</sup> percentile | 0.772                                |
| 25 <sup>th</sup> percentile | 0.837                                |
| 50 <sup>th</sup> percentile | 0.942                                |
| 75 <sup>th</sup> percentile | 0.987                                |
| 90 <sup>th</sup> percentile | 0.995                                |

---

|                           |       |
|---------------------------|-------|
| Skewness                  | 0.717 |
| Kurtosis                  | 0.826 |
| Entropy                   | 0.865 |
| Volume                    | 0.904 |
| Area                      | 0.904 |
| Max-diameter              | 0.832 |
| Entropy <sub>GLCM10</sub> | 0.800 |
| Entropy <sub>GLCM11</sub> | 0.809 |
| Entropy <sub>GLCM12</sub> | 0.801 |
| Entropy <sub>GLCM13</sub> | 0.810 |
| Inertia <sub>GLCM10</sub> | 0.888 |
| Inertia <sub>GLCM11</sub> | 0.939 |
| Inertia <sub>GLCM12</sub> | 0.921 |
| Inertia <sub>GLCM13</sub> | 0.910 |

---

SD: Standard deviation;PET: Positron emission tomography;GLCM: Grey-level co-occurrence matrix.
